# Supplementary material for: Enhanced metal–support interactions between Pd NPs and ZrSBA-15 for efficient aerobic benzyl alcohol oxidation
Source: Royal Society of Chemistry journal article supplement (doi:10.1039/c6ra17272e), 2016-01-01
Supplement: c6ra17272e1.pdf [file c6ra17272e1.pdf]

**Supplementary Information:**

**Enhanced metal-support interactions between Pd NPs and ZrSBA-15  
for efficient aerobic benzyl alcohol oxidation**

Ran Ji, Shangru Zhai\*, Wei Zheng, Zuoyi Xiao\*, Qingda An, Feng Zhang\*

Faculty of Light Industry and Chemical Engineering, Dalian Polytechnic University,

Dalian 116034, China

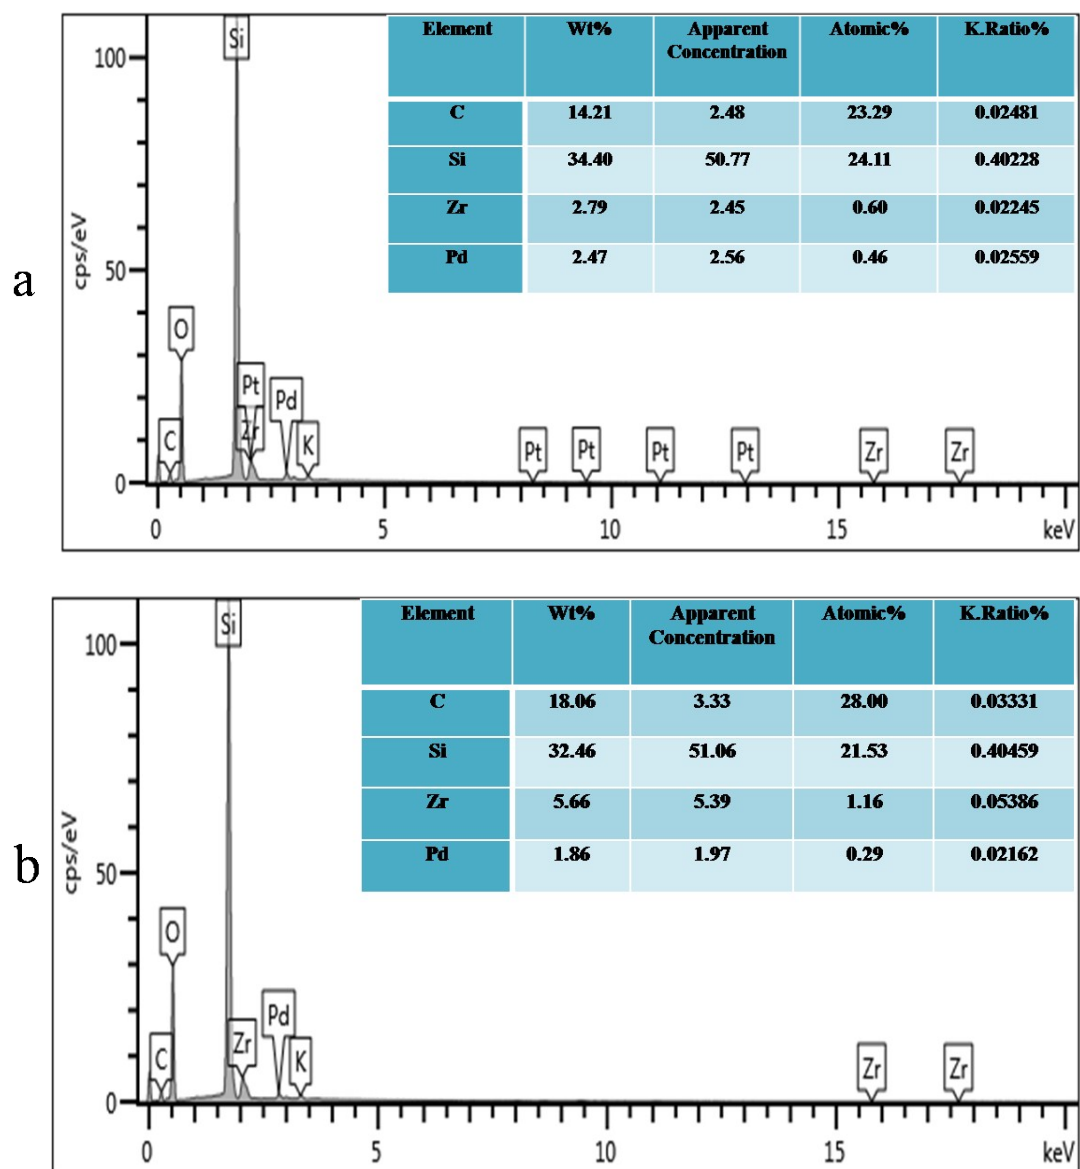

**Fig. S1.** The EDX results of 3.3wt% Pd/ZrSBA-15 and 3.3wt% Pd/ZrSBA-15/5t catalyst.

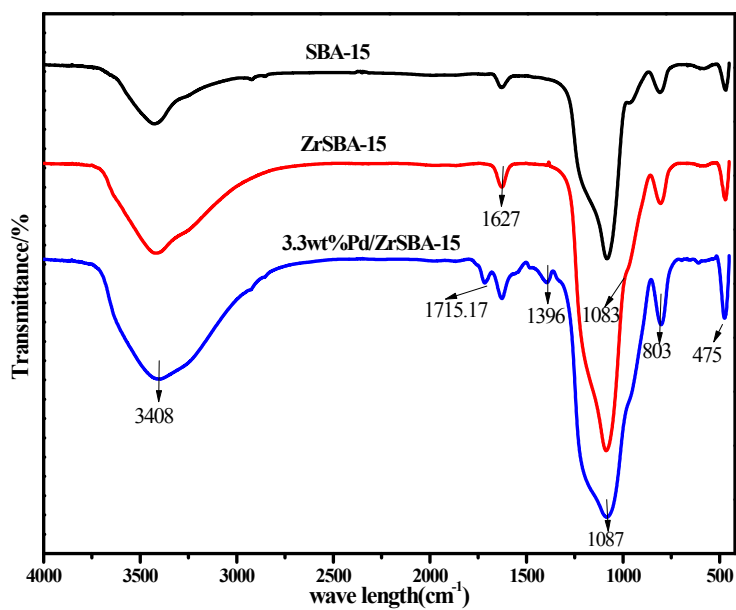

**Fig. S2.** FT-IR spectra of SBA-15, ZrSBA-15, 3.3wt%Pd/ZrSBA-15/5t.

**Table S1.** Textural properties of studied samples.

| Sample            | S <sub>BET</sub><br>(m <sup>2</sup> ·g <sup>-1</sup> ) | V <sub>total</sub><br>(m <sup>3</sup> ·g <sup>-1</sup> ) | PSD<br>(nm) |
|-------------------|--------------------------------------------------------|----------------------------------------------------------|-------------|
| Zr/SBA-15         | 617.74                                                 | 1.13                                                     | 8.52        |
| 3.3wt%Zr/SBA-15   | 483.26                                                 | 1.02                                                     | 6.99        |
| 3.3wt%ZrSBA-15/5t | 510.33                                                 | 1.04                                                     | 7.99        |
